# Supplementary material for: Molecular epidemiology of carbapenem-resistant gram-negative bacilli in Ecuador
Source: Springer Nature journal article supplement (doi:10.1186/s12879-024-09248-6), 2024-04-06
Supplement: MOESM2 [file 26952536]

Supplementary figure No. 1. Dendrogram results of *bla*<sub>VIM</sub>-positive *P. aeruginosa*

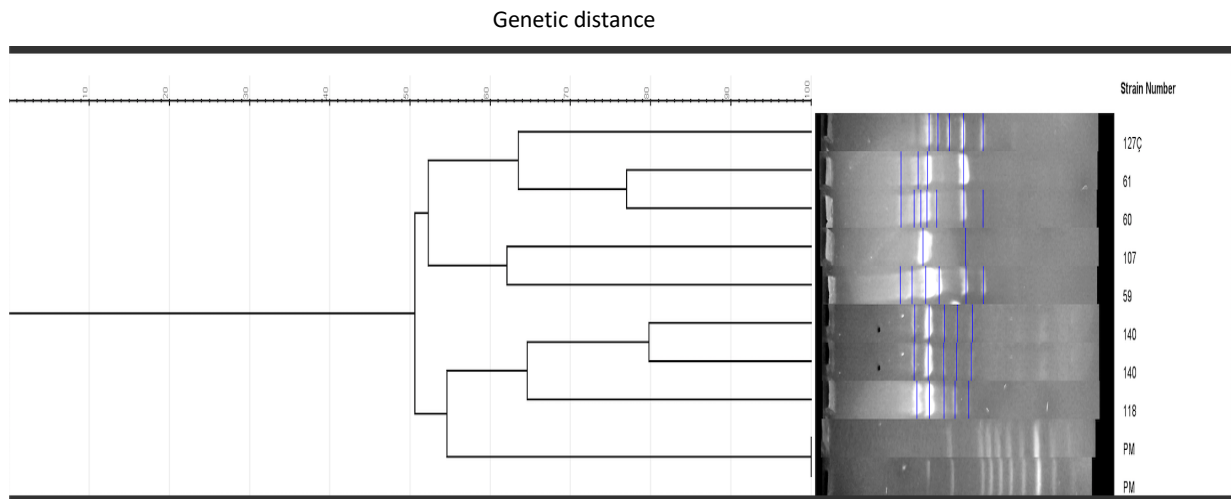

ERIC-PCR fingerprinting of *P. aeruginosa* . PM: Molecular weight marker. Eight isolates studied
