# Supplementary material for: Molecular epidemiology of carbapenem-resistant gram-negative bacilli in Ecuador
Source: Springer Nature journal article supplement (doi:10.1186/s12879-024-09248-6), 2024-04-06
Supplement: MOESM3 [file 26952536]

Supplementary figure No. 2. Dendrogram results of *bla*<sub>KPC</sub>-positive *K. pneumoniae*

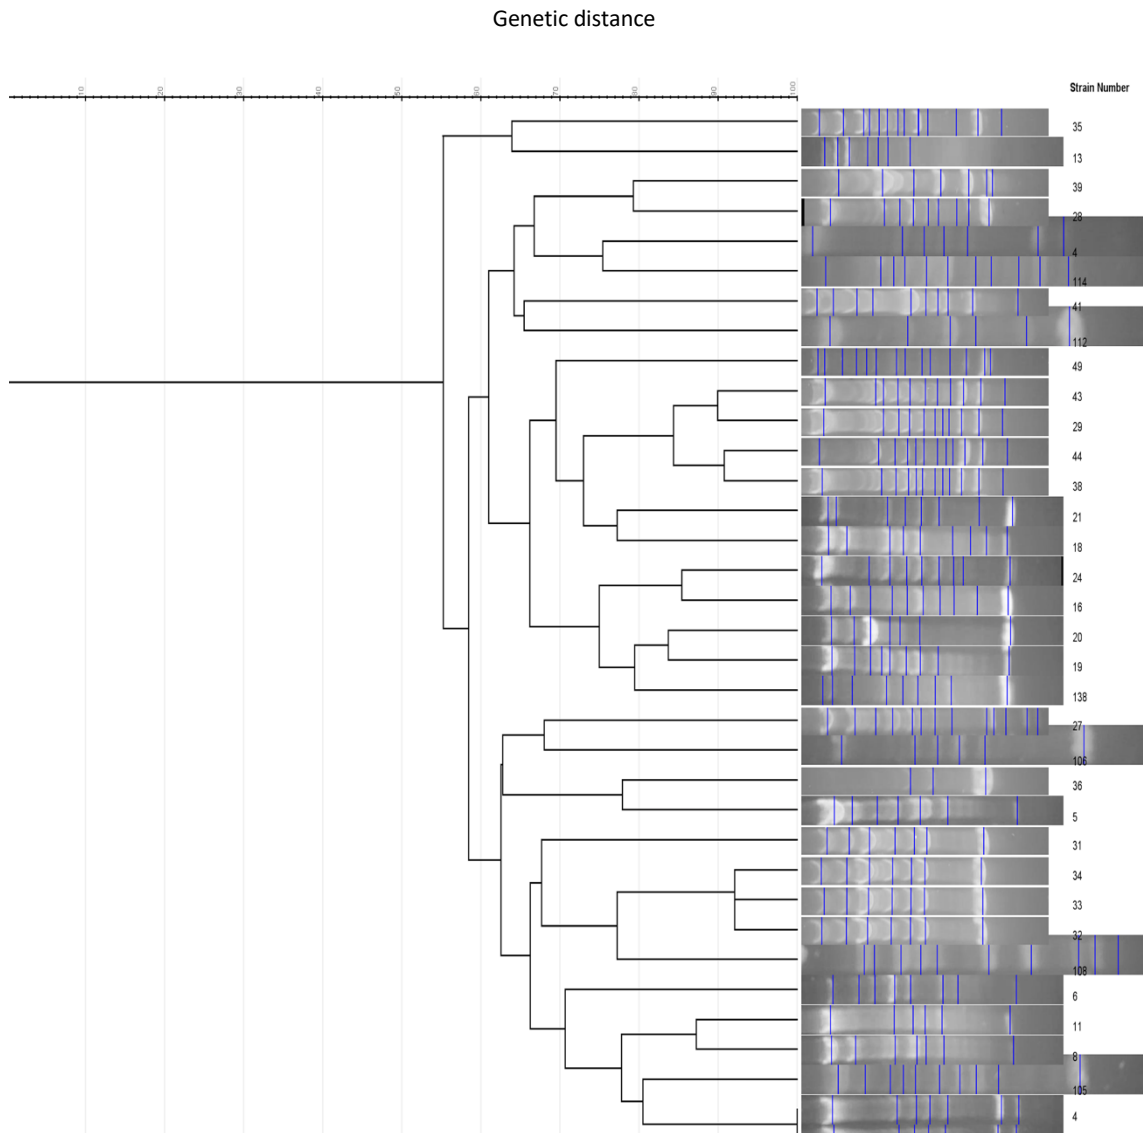

ERIC-PCR fingerprinting of *K. pneumoniae*. Thirty-five isolates studied
