# Supplementary material for: Molecular epidemiology of carbapenem-resistant gram-negative bacilli in Ecuador
Source: Springer Nature journal article supplement (doi:10.1186/s12879-024-09248-6), 2024-04-06
Supplement: MOESM4 [file 26952536]

Supplementary figure No. 3. Dendrogram results of *bla*<sub>OXA 24/40</sub>-positive *A. baumannii* complex

Genetic distance

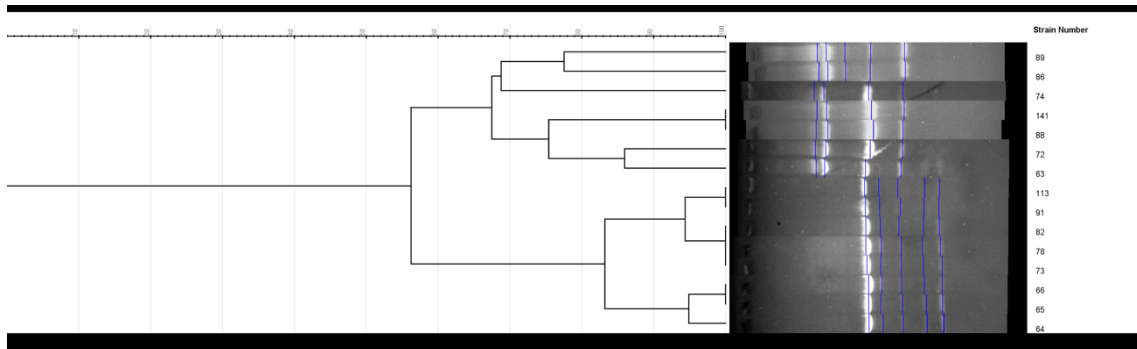

ERIC-PCR fingerprinting of *A. baumannii* complex
